# Supplementary material for: Platelet lysate gel and endothelial progenitors stimulate microvascular network formation in vitro: tissue engineering implications
Source: PubMed Central journal article supplement (PMC4855184; doi:10.1038/srep25326), 2016-05-04
Supplement: srep25326-s1.pdf [file srep25326-s1.pdf]

**Platelet lysate gel and endothelial progenitors stimulate capillary formation *in vitro*: implications for tissue engineering.**

**Tiago Moderno Fortunato<sup>1</sup>, Cristina Beltrami<sup>2</sup>, Costanza Emanuelli<sup>2</sup>, Paul De Bank<sup>1</sup> and Giordano Pula<sup>1</sup>**

<sup>1</sup>Department of Pharmacy and Pharmacology, University of Bath, Bath Spa (UK)

<sup>2</sup>Bristol Heart Institute, University of Bristol, Bristol (UK)

Corresponding author: G Pula, Department of Pharmacy and Pharmacology, University of Bath, Claverton Campus, Bath Spa (UK), BA2 7AY, Tel. +44 (0) 1225 385 755, Fax: +44 (0) 1225 386 114, email: G.Pula@bath.ac.uk

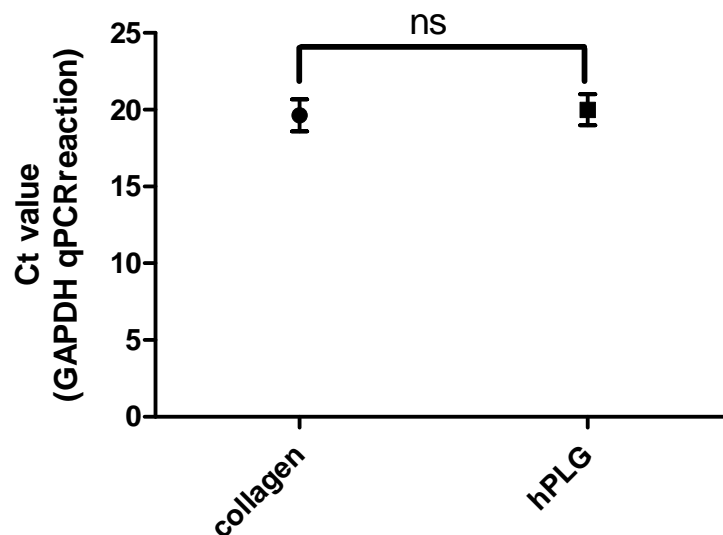

**Supplementary Figure 1: GAPDH expression in ECFCs cultured on collagen or hPLG.** Total RNA was extracted from ECFCs cultured on traditional coating (rat collagen) or hPLG for 24h and expression of selected genes was quantified by RT-qPCR. The amplification of a single PCR product was confirmed by melting curve analysis. Gene-specific mRNA levels were estimated by the  $2^{-\Delta\Delta C_t}$  analysis and normalized against GAPDH levels to obtain relative changes in gene expression, as previously described<sup>1</sup>. Data show mean $\pm$ SEM of the Ct (cycle threshold) for collagen and hPLG cultures. Ct is defined as the number of cycles required for the fluorescent signal to cross the threshold. Ct levels are inversely proportional to the amount of target nucleic acid in the sample. No statistical difference was observed (Mann-Whitney U-test, n=3).  
<sup>1</sup>Livak KJ, Schmittgen TD (2001) Analysis of relative gene expression data using real-time quantitative PCR and the  $2^{-(\Delta\Delta C(T))}$  Method. *Methods* 25: 402-408.

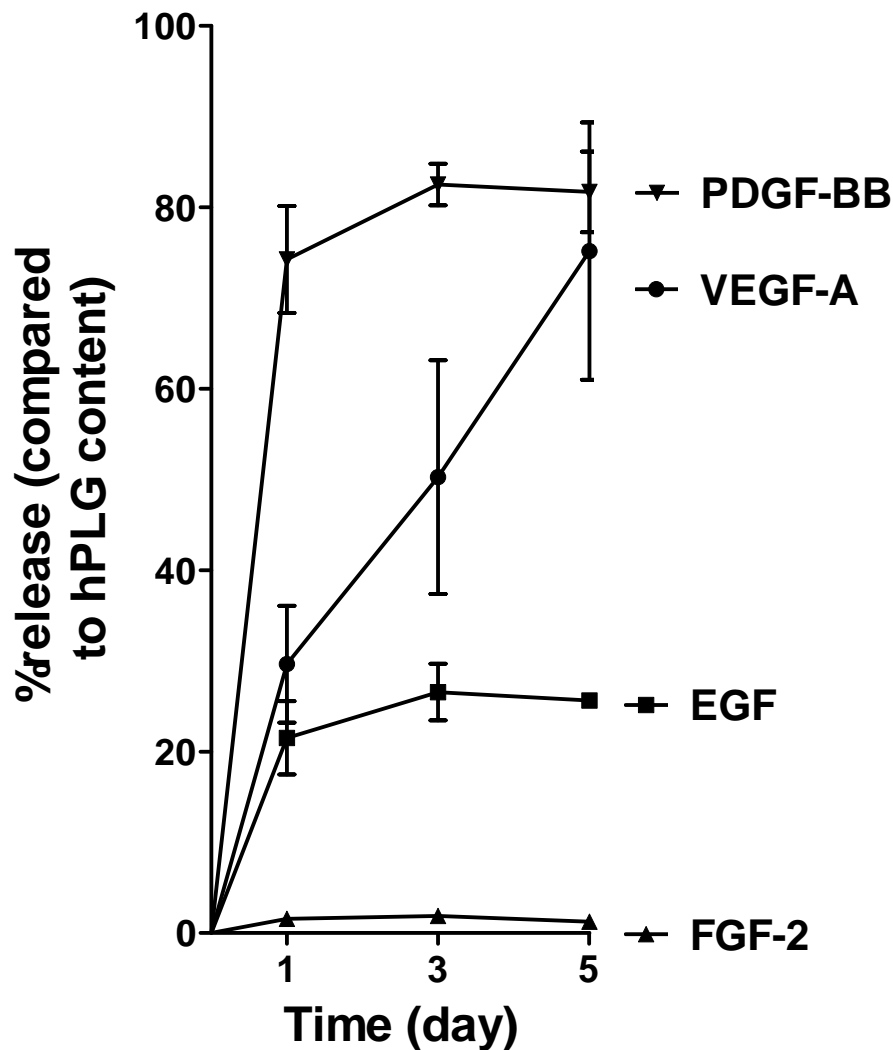

**Supplementary Figure 2: Growth factor release expressed as % of hPLG content).** Growth factor by hPLG in 1, 3 and 5 days of culture conditions were determined by ELISA using the Human Growth Factor II ELISA Strip Kit (Signosis, Santa Clara, US) according to the manufacturer's instructions. hPLG was prepared as previously described in 12-well plates (1ml/well). After one wash in PBS, 1mL of medium was added immediately after polymerization. Samples of conditioned medium in the absence of cells were collected after 1, 3 or 5 days of incubation at 37 °C. Data show the release as % of the content in hPLG (shown in Figure 1C) and are presented as mean±SEM. Data are representative of three independent experiments.

## Supplementary table 1. qPCR primer sequences

| Target             | Forward primer<br>5'-3' | Reverse primer<br>5'-3' |
|--------------------|-------------------------|-------------------------|
| <i>CD31</i>        | TCGGAAGGATAAAACGCGGTC   | CCAAGGTGGGATCGTGAGG     |
| <i>eNOS</i>        | TGATGGCGAAGCGAGTGAAG    | ACTCATCCATACACAGGACCC   |
| <i>VE-cadherin</i> | AAGCGTGAGTCGCAAGAATG    | TCTCCAGGTTTTCGCCAGTG    |
| <i>vWF</i>         | GCCCTGGTTGCCATTGTAATTC  | AGCCTTGTGAAACTGAAGCAT   |
| <i>CXCR4</i>       | CCCACAATGCCAGTTAAGAAGA  | ACTACACCGAGGAAATGGGCT   |
| <i>SDF-1</i>       | ATTCTCAAACTCCAAACTGTGC  | ACTTTAGCTTCGGGTCAATGC   |
| <i>Angiogenin</i>  | CTGGGCGTTTTGTTGTTGGTC   | GGTTTGGCATCATAGTGCTGG   |
| <i>VEGF-A</i>      | AGGGTCTCGATTGGATGGCA    | AGGGCAGAATCATCACGAAGT   |
| <i>VEGFR-2</i>     | CCAGTGTCATTTCCGATCACTTT | GGCCAATAATCAGAGTGGCA    |
| <i>FGFR-1</i>      | AATGAGTACGGCAGCATCAAC   | ACCTCGATGTGCTTTAGCCAC   |
| <i>PDGFR-β</i>     | AGACACGGGAGAATACTTTTGC  | AGTTCCTCGGCATCATTAGGG   |
| <i>GAPDH</i>       | AGCCGCATCTTCTTTTGCCT    | TGACGAACATGGGGGCATCA    |

Supplementary table 2. Test of normality and homoscedasticity for data presented in Figures 3B, 3D, 3F, 4A and 7D

| <b>Figure 3B</b>         |                     |                                      |               |               |               |       |               |               |               |               |
|--------------------------|---------------------|--------------------------------------|---------------|---------------|---------------|-------|---------------|---------------|---------------|---------------|
|                          | Collagen:           | Vehicle                              | Ki8751        | Tivozanib     | Pazopanib     | hPLG: | Vehicle       | Ki8751        | Tivozanib     | Pazopanib     |
|                          |                     | 1.198925                             | 0.8602151     | 0.937634      | 1.021505      |       | 2.770318      | 1.222615      | 0.8127208     | 1.399293      |
|                          |                     | 1.021505                             | 0.5322581     | 0.6827957     | 1.032258      |       | 2.29682       | 0.9469965     | 1.611307      | 1.498233      |
|                          |                     | 1.478495                             | 0.5537634     | 0.8655914     | 0.6344086     |       | 2.840989      | 0.9116608     | 1.533569      | 1.194346      |
|                          |                     | 1.333333                             | 0.7526882     | 0.8978494     | 1.05914       |       | 2.325088      | 1.053004      | 0.7985865     | 1.477032      |
|                          |                     | 0.9301075                            | 0.688172      | 0.7849463     | 0.9408602     |       | 2.59364       | 1.187279      | 1.378092      | 1.420495      |
|                          |                     | 1.392473                             | 0.6182796     | 0.7741935     | 0.8591398     |       | 2.763251      | 0.8339223     | 1.289046      | 1.75265       |
|                          | <b>Variance =</b>   | 0.04661815                           | 0.0156945     | 0.00880813    | 0.02556846    |       | 0.05625073    | 0.02432128    | 0.12457872    | 0.03263204    |
| <b>Shapiro-Wilk test</b> | <b>W =</b>          | <b>0.9417</b>                        | <b>0.9487</b> | <b>0.9602</b> | <b>0.8455</b> |       | <b>0.8527</b> | <b>0.9316</b> | <b>0.8619</b> | <b>0.9406</b> |
|                          | <b>Conclusion =</b> | <b>Data are normally distributed</b> |               |               |               |       |               |               |               |               |
| <b>Bartlett's test</b>   | <b>Chisquare =</b>  | <b>10.9661</b>                       |               |               |               |       |               |               |               |               |
|                          | <b>P value =</b>    | <b>0.14</b>                          |               |               |               |       |               |               |               |               |
|                          | <b>Conclusion =</b> | <b>Data have equal variance</b>      |               |               |               |       |               |               |               |               |

**Figure 3D**

| Collagen: | Vehicle   | PD98059   | hPLG: | Vehicle  | PD98059  |
|-----------|-----------|-----------|-------|----------|----------|
|           | 1.198925  | 1.107527  |       | 2.770318 | 1.491166 |
|           | 1.021505  | 1.134409  |       | 2.29682  | 1.830389 |
|           | 1.478495  | 1.193548  |       | 2.840989 | 1.992933 |
|           | 1.333333  | 1.198925  |       | 2.325088 | 1.65371  |
|           | 0.9301075 | 0.9892473 |       | 2.59364  | 1.844523 |
|           | 1.392473  | 0.9408602 |       | 2.763251 | 1.667845 |

**Variance:** 0.04661815 0.01143196 0.05625073 0.031473346

**Shapiro-Wilk test** W = **0.9417** **0.8907** **0.8527** **0.9688**  
Conclusion = **Data are normally distributed**

**Bartlett's test** Chisquare = **2.9795**  
P value = **0.395**  
Conclusion = **Data have equal variance**

**Figure 3F**

|                          |                     | Collagen                               | Collagen +<br>hPL | Fibrin        | Fibrin +<br>hPL | hPLG          |
|--------------------------|---------------------|----------------------------------------|-------------------|---------------|-----------------|---------------|
|                          |                     | 1.015544                               | 1.3057            | 1.158537      | 1.597561        | 2.227612      |
|                          |                     | 1.212435                               | 1                 | 1.103659      | 1.615854        | 2.048508      |
|                          |                     | 1.160622                               | 1.222798          | 1.353659      | 1.420732        | 2.227612      |
|                          |                     | 1.243523                               | 1.53886           | 1.371951      | 1.371951        | 2.132463      |
|                          |                     | 0.968912                               | 0.9082902         | 1.25          | 1.347561        | 2.003731      |
|                          |                     | 1.07772                                | 0.880829          | 1.432927      | 1.445122        | 2.014926      |
|                          | <b>Variance:</b>    | 0.01213901                             | 0.06676302        | 0.01680048    | 0.01302426      | 0.010455753   |
| <b>Shapiro-Wilk test</b> | <b>W =</b>          | <b>0.9419</b>                          | <b>0.9200</b>     | <b>0.9380</b> | <b>0.8697</b>   | <b>0.8516</b> |
|                          | <b>Conclusion</b>   | <b>= Data are normally distributed</b> |                   |               |                 |               |
| <b>Bartlett's test</b>   | <b>Chisquare =</b>  | <b>6.75543</b>                         |                   |               |                 |               |
|                          | <b>P value =</b>    | <b>0.149</b>                           |                   |               |                 |               |
|                          | <b>Conclusion =</b> | <b>Data have equal variance</b>        |                   |               |                 |               |

**Figure 4A**

|                          |                     | Collagen                             | Fibrin        | hPLG          |
|--------------------------|---------------------|--------------------------------------|---------------|---------------|
|                          |                     | 895.62                               | 1532.96       | 4715.09       |
|                          |                     | 861.95                               | 1903.07       | 4319.56       |
|                          |                     | 1028.54                              | 1777.7        | 4148.83       |
|                          |                     | 1104.29                              | 1846.04       | 4245.98       |
|                          |                     | 927.02                               | 1704.57       | 4100.35       |
|                          |                     | 840.63                               | 2012.66       | 4270.18       |
|                          | <b>Variance:</b>    | 10576.0999                           | 27758.7504    | 47840.4372    |
| <b>Shapiro-Wilk test</b> | <b>W =</b>          | <b>0.9074</b>                        | <b>0.9873</b> | <b>0.8292</b> |
|                          | <b>Conclusion</b>   | <b>Data are normally distributed</b> |               |               |
|                          | <b>=</b>            |                                      |               |               |
| <b>Bartlett's test</b>   | <b>Chisquare =</b>  | <b>2.50513</b>                       |               |               |
|                          | <b>P value =</b>    | <b>0.286</b>                         |               |               |
|                          | <b>Conclusion =</b> | <b>Data have equal variance</b>      |               |               |

**Figure 7B**

|                          | Area:               | Collagen                               | Fibrin        | hPLG          | Length:             | Collagen                               | Fibrin        | hPLG          |
|--------------------------|---------------------|----------------------------------------|---------------|---------------|---------------------|----------------------------------------|---------------|---------------|
|                          |                     | 0.13                                   | 0.23          | 3.61          |                     | 0.0375                                 | 0.0731        | 0.5741        |
|                          |                     | 0.01                                   | 0.12          | 4.02          |                     | 0.0102                                 | 0.0627        | 0.5869        |
|                          |                     | 0.02                                   | 0.09          | 3.88          |                     | 0.0440                                 | 0.0686        | 0.5488        |
|                          |                     | 0.25                                   | 0.41          | 4.11          |                     | 0.0562                                 | 0.0154        | 0.5461        |
|                          |                     | 0.06                                   | 0.24          | 3.96          |                     | 0.0254                                 | 0.0814        | 0.6114        |
|                          |                     | 0.09                                   | 0.15          | 3.84          |                     | 0.0378                                 | 0.0256        | 0.5975        |
|                          | <b>Variance:</b>    | 0.00786667                             | 0.01346667    | 0.02993987    | <b>Variance:</b>    | 0.000250306                            | 0.00073912    | 0.00069161    |
| <b>Shapiro-Wilk test</b> | <b>W =</b>          | <b>0.8970</b>                          | <b>0.9021</b> | <b>0.9639</b> | <b>W =</b>          | <b>0.9692</b>                          | <b>0.8564</b> | <b>0.9321</b> |
|                          | <b>Conclusion</b>   | <b>= Data are normally distributed</b> |               |               | <b>Conclusion</b>   | <b>= Data are normally distributed</b> |               |               |
| <b>Bartlett's test</b>   | <b>Chisquare =</b>  | <b>2.17161</b>                         |               |               | <b>Chisquare =</b>  | <b>1.5247</b>                          |               |               |
|                          | <b>P value =</b>    | <b>0.338</b>                           |               |               | <b>P value =</b>    | <b>0.467</b>                           |               |               |
|                          | <b>Conclusion =</b> | <b>Data have equal variance</b>        |               |               | <b>Conclusion =</b> | <b>Data have equal variance</b>        |               |               |
